# Supplementary material for: Protocol of a Prospective Observational Study on the Relationship Between Glucose Fluctuation and Cardiovascular Events in Patients with Type 2 Diabetes
Source: PubMed Central journal article supplement — Diabetes Ther. 2019 Jul 23;10(5):1565–75. doi: 10.1007/s13300-019-0665-8 (PMC6778560; doi:10.1007/s13300-019-0665-8), 2019-07-23
Supplement: 13300_2019_665_MOESM1_ESM.pdf [file 13300_2019_665_MOESM1_ESM.pdf]

Supplementary Table 1. List of sites and investigators.

| Site                                                                                                 | Investigator                                                                                                                                                                                               |
|------------------------------------------------------------------------------------------------------|------------------------------------------------------------------------------------------------------------------------------------------------------------------------------------------------------------|
| Ashiya Central Hospital                                                                              | Koji Matsushita, Manabu Narisawa                                                                                                                                                                           |
| Aso Clinic                                                                                           | Katsumi Aso, Yuko Ando, Fumihiko Sato                                                                                                                                                                      |
| Hagiwara Central Hospital                                                                            | Emiko Morita, Keiichi Torimoto                                                                                                                                                                             |
| Hayashi Clinic                                                                                       | Isao Hayashi                                                                                                                                                                                               |
| Inokuchi Clinic                                                                                      | Nobuo Inokuchi                                                                                                                                                                                             |
| Japan Community Health Care Organization Osaka Hospital                                              | Masahiro Hatazaki, Arichika Deguchi, Azusa Shiraki                                                                                                                                                         |
| Juntendo Tokyo Koto Geriatric Medical Center (Department of Medicine, Diabetology and Endocrinology) | Ayako Kitamura, Eri Tanabe, Hidenori Yoshii, Tomio Onuma, Tomo Nakajima                                                                                                                                    |
| Juntendo University Graduate School of Medicine (Department of Metabolism & Endocrinology)           | Eisuke Yasunari, Hideyoshi Kaga, Hiroaki Sato, Hiroataka Watada, Kagemi Takeno, Luka Suzuki, Miwa Himuro, Syuhei Aoyama, Takashi Hunayama, Takehiro Katahira, Takeshi Miyatsuka, Tomoya Mita, Yuya Nishida |
| Juntendo University Nerima Hospital (Department of Medicine, Diabetes and Endocrinology)             | Koji Komiya                                                                                                                                                                                                |
| Kanda Naika Clinic                                                                                   | Satoshi Kawashima                                                                                                                                                                                          |
| Kansai Rosai Hospital (Diabetes and Endocrinology)                                                   | Tsunehiko Yamamoto                                                                                                                                                                                         |
| Kihara Diabetes Clinic                                                                               | Yasuyuki Kihara                                                                                                                                                                                            |
| Kosugi Medical Clinic                                                                                | Keisuke Kosugi                                                                                                                                                                                             |
| Kawasaki Hospital (Department of Internal Medicine)                                                  | Akihito Otsuka, Jun Murai                                                                                                                                                                                  |
| Matsuoka Medical Clinic                                                                              | Hirofumi Matsuoka                                                                                                                                                                                          |
| Misaki Naika Clinic                                                                                  | Nobuichi Kuribayashi                                                                                                                                                                                       |
| Japan Labour Health and Safety                                                                       | Tadashi Arao, Kei Sugai                                                                                                                                                                                    |

|                                                                                                                                 |                                                                                                                                    |
|---------------------------------------------------------------------------------------------------------------------------------|------------------------------------------------------------------------------------------------------------------------------------|
| Organization Kyushu Rosai<br>Hospital, Moji Medical Center<br>(Department of Internal Medicine)                                 |                                                                                                                                    |
| Musashino Family Clinic                                                                                                         | Yuichi Kojima                                                                                                                      |
| Nakakinen Clinic                                                                                                                | Maiko Nakata, Miyoko Saito, Takeshi Osonoi, Yusuke Osonoi                                                                          |
| Nakama Municipal hospital                                                                                                       | Kohei Uriu, Yosifumi Inada, Kanako Suzuka, Ichiro Takagi                                                                           |
| National Hospital Organization<br>Osaka National Hospital (Diabetes<br>Center)                                                  | Ken Kato                                                                                                                           |
| Nishida Keiko Diabetes Clinic                                                                                                   | Keiko Nishida, Akira Kurozumi, Fumi Uemura, Keiichi<br>Torimoto, Maiko Hajime, Manabu Narisawa, Satomi Sonoda,<br>Kumiko Tidiwa    |
| Osaka General Medical Center<br>(Department of Diabetes and<br>Endocrinology)                                                   | Youhei Fujita, Sayoko Shimizu, Masahisa Hata, Yutaka<br>Umayahara                                                                  |
| Osaka Police Hospital (Department<br>of Endocrinology and Metabolism)                                                           | Tetsuyuki Yasuda                                                                                                                   |
| Osaka Rosai Hospital                                                                                                            | Ryomoto Kayoko                                                                                                                     |
| Osaka University Graduate School<br>of Medicine (Department of<br>Metabolic Medicine)                                           | Iichiro Shimomura, Naoto Katakami, Takaaki Matasuoka,<br>Mitsuyoshi Takahara, Kazuyuki Miyashita, Hiroyo Ninomiya,<br>Naohiro Taya |
| Sasaki Hospital                                                                                                                 | Shinichiro Mine, Kenji Koikawa                                                                                                     |
| School of Medicine, University of<br>Occupational and Environmental<br>Health, Japan (First Department of<br>Internal Medicine) | Yosuke Okada, Akira Kurozumi, Manabu Narisawa, Maiko<br>Hajime, Fumi Uemura, Satomi Sonoda, Kenichi Tanaka,<br>Takashi Otsuka      |
| Secomedic Hospital                                                                                                              | Satomi Wakasugi, Tomoya Mita                                                                                                       |
| Shiraiwa Medical Clinic                                                                                                         | Toshihiko Shiraiwa                                                                                                                 |
| Taneda Clinic                                                                                                                   | Yoshinobu Taneda                                                                                                                   |
| Takaishi Naika Ichoka Clinic                                                                                                    | Tomoya Mita                                                                                                                        |
| Tobata General Hospital                                                                                                         | Kazuko Kanda                                                                                                                       |

(Department of Internal Medicine)

Wakamatsu Hospital of the

University of Occupational and      Torimoto Keiichi, Nishio Kousuke

Environmental Health

---

Sites and investigators are listed in alphabetical order.

Supplementary Table 2. List of sites, committee name and reference number.

| Site                                                                                                 | Committee name                                                                  | Reference Number |
|------------------------------------------------------------------------------------------------------|---------------------------------------------------------------------------------|------------------|
| Ashiya Central Hospital                                                                              | The ethics committee of Fukuda clinic                                           | IRB-20181020-4   |
| Aso Clinic                                                                                           | The ethics committee of Fukuda clinic                                           | IRB-20181020-4   |
| Hagiwara Central Hospital                                                                            | The ethics committee of Fukuda clinic                                           | IRB-20181020-4   |
| Hayashi Clinic                                                                                       | The ethics committee of Fukuda clinic                                           | IRB-20180721-2   |
| Inokuchi Clinic                                                                                      | The ethics committee of Fukuda clinic                                           | IRB-20180915-2   |
| Japan Community Health Care Organization Osaka Hospital                                              | The ethics committee of Japan Community Health Care Organization Osaka Hospital | 2018-24          |
| Juntendo Tokyo Koto Geriatric Medical Center (Department of Medicine, Diabetology and Endocrinology) | The ethics committee of Juntendo Tokyo Koto Geriatric Medical Center            | 103-14           |
| Juntendo University Graduate School of Medicine (Department of Metabolism & Endocrinology)           | The Hospital ethics committee of Juntendo University Hospital                   | 17-298           |
| Juntendo University Nerima Hospital (Department of Medicine, Diabetes and Endocrinology)             | The ethics committee of Juntendo University Nerima Hospital                     | Rin 30-24        |
| Kanda Naika Clinic                                                                                   | The ethics committee of Fukuda clinic                                           | IRB-20180915-2   |
| Kansai Rosai Hospital (Diabetes and Endocrinology)                                                   | The ethics committee of Kansai Rosai Hospital                                   | 18CO47g          |
| Kihara Diabetes Clinic                                                                               | The ethics committee of Fukuda clinic                                           | IRB-20181020-4   |

|                                                                                                                                |                                                                                   |                |
|--------------------------------------------------------------------------------------------------------------------------------|-----------------------------------------------------------------------------------|----------------|
| Kosugi Medical Clinic                                                                                                          | The ethics committee of Fukuda clinic                                             | IRB-20180721-2 |
| Kawasaki Hospital (Department of Internal Medicine)                                                                            | The ethics committee of Kawasaki Hospital                                         | 1-4-1          |
| Matsuoka Medical Clinic                                                                                                        | The ethics committee of Fukuda clinic                                             | IRB-20181020-4 |
| Misaki Naika Clinic                                                                                                            | The ethics committee of Fukuda clinic                                             | IRB-20180721-2 |
| Japan Labour Health and Safety Organization<br>Kyushu Rosai Hospital, Moji Medical Center<br>(Department of Internal Medicine) | The ethics committee of Moji Medical Center                                       | 30-4           |
| Musashino Family Clinic                                                                                                        | The ethics committee of Fukuda clinic                                             | IRB-20180818-4 |
| Nakakinen Clinic                                                                                                               | The ethics committee of Nakakinen Clinic                                          | none           |
| Nakama Municipal hospital                                                                                                      | The ethics committee of Fukuda clinic                                             | IRB-20180818-4 |
| National Hospital Organization Osaka<br>National Hospital (Diabetes Center)                                                    | The ethics committee of National Hospital Organization Osaka<br>National Hospital | 18109          |
| Nishida Keiko Diabetes Clinic                                                                                                  | The ethics committee of Fukuda clinic                                             | IRB-20180915-2 |
| Osaka General Medical Center (Department of Diabetes and Endocrinology)                                                        | The ethics committee of Osaka General Medical Center                              | CRB-18-01-004  |
| Osaka Police Hospital (Department of Endocrinology and Metabolism)                                                             | The ethics committee of Osaka Police Hospital                                     | 924            |
| Osaka Rosai Hospital                                                                                                           | The ethics committee of Osaka Rosai Hospital                                      | 30-37          |

|                                                                                                                              |                                                                                             |                |
|------------------------------------------------------------------------------------------------------------------------------|---------------------------------------------------------------------------------------------|----------------|
| Osaka University Graduate School of<br>Medicine (Department of Metabolic Medicine)                                           | Osaka University Clinical<br>Research Review<br>Committee                                   | 18112          |
| Sasaki Hospital                                                                                                              | The ethics committee of<br>Fukuda clinic                                                    | IRB-20181020-4 |
| School of Medicine, University of<br>Occupational and Environmental Health,<br>Japan (First Department of Internal Medicine) | The ethics committee of<br>University of Occupational<br>and Environmental Health,<br>Japan | H30-086        |
| Secomedic Hospital                                                                                                           | The ethics committee of<br>Secomedic Hospital                                               | 2018-02        |
| Shiraiwa Medical Clinic                                                                                                      | The ethics committee of<br>Fukuda clinic                                                    | IRB-20180519-4 |
| Taneda Clinic                                                                                                                | The ethics committee of<br>Fukuda clinic                                                    | IRB-20180721-2 |
| Takaishi Naika Ichoka Clinic                                                                                                 | The ethics committee of<br>Fukuda clinic                                                    | IRB-20180421-1 |
| Tobata General Hospital (Department of<br>Internal Medicine)                                                                 | The ethics committee of<br>Fukuda clinic                                                    | IRB-20181020-4 |
| Wakamatsu Hospital of the University of<br>Occupational and Environmental Health                                             | The ethics committee of<br>University of Occupational<br>and Environmental Health,<br>Japan | H30-086        |

---
